# Supplementary material for: Rokubacteria: Genomic Giants among the Uncultured Bacterial Phyla
Source: PubMed Central journal article supplement (PMC5712423; doi:10.3389/fmicb.2017.02264), 2017-11-28
Supplement: Presentation1.pdf [file Presentation1.pdf]

1 **Supplemental Material for the Article Entitled ‘Rokubacteria: genomic giants among the**  
2 **uncultured Bacteria phyla’**

3  
4  
5 **Supplemental Section I: Predicted class-level metabolisms**

6 All SAGs were examined in parallel for shared metabolic potential at the class-level, and  
7 the least contaminated metagenomic bins from OV-2 (bin 8) and *Tabebuia* (*T. heterophylla*)  
8 rhizosphere were used to supplement phylum-level metabolic analyses (Supplemental Figure 1).

9 In contrast to a prior report (Hug et al., 2016), we found that Rokubacteria SAG  
10 assemblies and metagenomic bins encode for a complete glycolytic pathway in addition to a  
11 complete TCA cycle and pentose phosphate pathway. Proteins predicted to be involved in  
12 aerobic respiration include components of the NADH dehydrogenase complex I, succinate  
13 dehydrogenase complex II and fumarate reductase, and the cytochrome *c* oxidase complex IV.  
14 Genes encoding for subunits of a putative F-type ATP synthase were identified, suggesting that  
15 these organisms have the capability for organic carbon acquisition and aerobic respiration. SAGs  
16 also contained genes for denitrification, including nitrate reductase and nitric acid reductase  
17 genes, although nitric oxide reductase and nitrous oxide reductase were not identified.  
18 Rokumicrobia SAGs encoded putative nitrite oxidoreductases, which are universally conserved  
19 in the Nitrospirae lineage. However, these proteins do not cluster with the experimentally  
20 verified uni-directional nitrite oxidoreductases of the Nitrospirae and Nitrospina (Supplemental  
21 Figure 7), and could be a bi-directional enzyme involved in nitrate reduction to nitrite instead  
22 (Sorokin et al., 2012). The Rokumicrobia SAG AD-967-E21 from the deep subsurface site in  
23 Finsch uniquely encodes nitrous oxide reductase (*nosZ*) in addition to nitrate reductase and  
24 nitrite reductase, and sulfur oxidation gene (*soxA*), which was also found in metagenomic bins  
25 from the Rifle site by a prior study (Hug et al., 2016). Coinciding this observation, Finsch mine

26 contained high levels of sulfate (93 mg/L), which may be the result of microbial sulfur oxidation  
27 (Supplemental Table 1). A sulfane dehydrogenase subunit gene (*soxC*) was detected in one  
28 Infratellusbacteria SAG; however, all other SAGs lacked sulfur oxidation pathway genes,  
29 indicating that they are unable to oxidize reduced sulfur sources for energy or that these genes  
30 remain undetected due to incomplete assemblies. Multiple SAGs in both classes also contained  
31 genes involved in arsenite/arsenate detoxification, including arsenite oxidase, arsenite reductase,  
32 and an arsenite-specific transporter. Overall, Rokubacteria can putatively utilize multiple electron  
33 donors and acceptors.

34 Rokubacteria SAGs also contain genes involved in the fermentation of pyruvate to acetyl-  
35 CoA (*pdh*), acetyl-CoA to acetate (*acs*), acetate to acetaldehyde (ALDH), and acetaldehyde to  
36 ethanol (*adh*). Rokubacteria SAGs encode for the oxidative degradation of aromatic compounds,  
37 such as oxidative degradation of benzoyl-CoA and hydroxybenzoyl-CoA, and anaerobic  
38 enzymes benzoyl/hydroxybenzoyl-CoA reductase and phenylacetyl-CoA oxidoreductase,  
39 suggesting heterotrophic alternatives for energy production. Additionally, we found no evidence  
40 of methylotrophy (specifically methanol dehydrogenase) as reported in Butterfield et al.  
41 (Butterfield et al., 2016), though the Ribulose-P pathway to anabolize formaldehyde to fructose  
42 was identified.

43 Some Rokubacteria SAG assemblies contained pyruvate:ferredoxin oxidoreductase and  
44 acetyl-CoA reductase, two of the three diagnostic enzymes of the reverse TCA cycle (Figure 5  
45 and Supplemental Table 5) (Hugler et al., 2005). However, ATP citrate lyase was not annotated.  
46 Further, Rokumicrobia SAGs contained carbon monoxide dehydrogenase, but lacked acetyl-CoA  
47 synthase, which are enzymes indicative of the Wood-Ljungdahl pathway (i.e. reverse acetyl-CoA

48 pathway). While incomplete, partial evidence for multiple autotrophic pathways in the same  
49 organism is interesting.

50 As mentioned in the main text, SAGs and metagenomic bins encode for multiple proteins  
51 involved in DNA packaging and super-coiling (Supplementary Table 5) (Dillon and Dorman,  
52 2010), including topoisomerase (*top*), DNA gyrase (*gyr*), *parB* (chromosome partitioning  
53 protein), *hupB* (binding protein HU-beta), *ssb* (single-stranded DNA binding protein), *cbpA*;  
54 curved DNA-binding protein and *smc* (chromosome segregation protein) (Supplemental Figure 1  
55 and Supplemental Table 5). Rokumicrobia SAGs also contained integration host factors  
56 (IHF) which may associate with DNA in a non-specific manner contributing to bacterial  
57 chromatin organization, and *dps* (starvation-inducible DNA-binding protein) that organizes  
58 the nucleoid to protect it from potential threats (Lee et al., 2015). While many of the genes  
59 identified in Rokubacteria are present in well-studied bacteria, Rokubacteria are predicted to  
60 contain a variety of known DNA packaging mechanisms.

61 Rokumicrobia OV-2 assemblies encode complete pathways for dissimilatory nitrate  
62 reduction to ammonium (*narGHU*, *nirBD*) and assimilatory nitrate reduction (*narB*, *nirA*). Some  
63 additional interesting features of Rokubacteria SAGs include the ability to synthesize unusual  
64 lipids, including an unknown hopanoid derivative of bactriohopanetetrol and a putative  
65 phosphonolipid (located on the same contig in multiple SAGs). Numerous SAGs could  
66 putatively produce an unknown glycosylated pterin derivative encoded by a gene cluster  
67 including a protein tyrosine phosphatase (PTPS) enzyme. In addition, genomes derived from  
68 OV-2 sample encode a succinate dehydrogenase and fumarate reductase enzymes with high  
69 similarity to *Mycobacterium tuberculosis* (Hartman et al., 2014). These enzymes were not found  
70 in the genomes extracted from *Tabebuia* rhizosphere and Rifle sediment despite high degree of

71 completeness of these genomes, suggesting recent horizontal transfer or greater flexibility of  
72 respiratory chain metabolism than was previously annotated (Anantharaman et al., 2016).

73         It is important to note that all class-level metabolic predictions are inferred from  
74 genetically divergent and incomplete SAGs, and metagenomic bins containing genetically  
75 distinct individuals, though these inferences can provide an important first glimpse at the shared  
76 metabolic traits contained within these classes and phylum. We have confidence in predictions of  
77 metabolism that contain all, or nearly all, proteins in a given pathway, and are annotated with  
78 high confidence. However, many single proteins predicted to be present in uncultivated lineages  
79 are low confidence annotations, as reference genomes are evolutionarily distant, and metabolic  
80 predictions must always be interpreted with caution. Overall, both SAG and metagenomic bin  
81 content suggests that Rokubacteria have a generalist strategy for survival, using a mixotrophic  
82 metabolism for energy production.

83

84

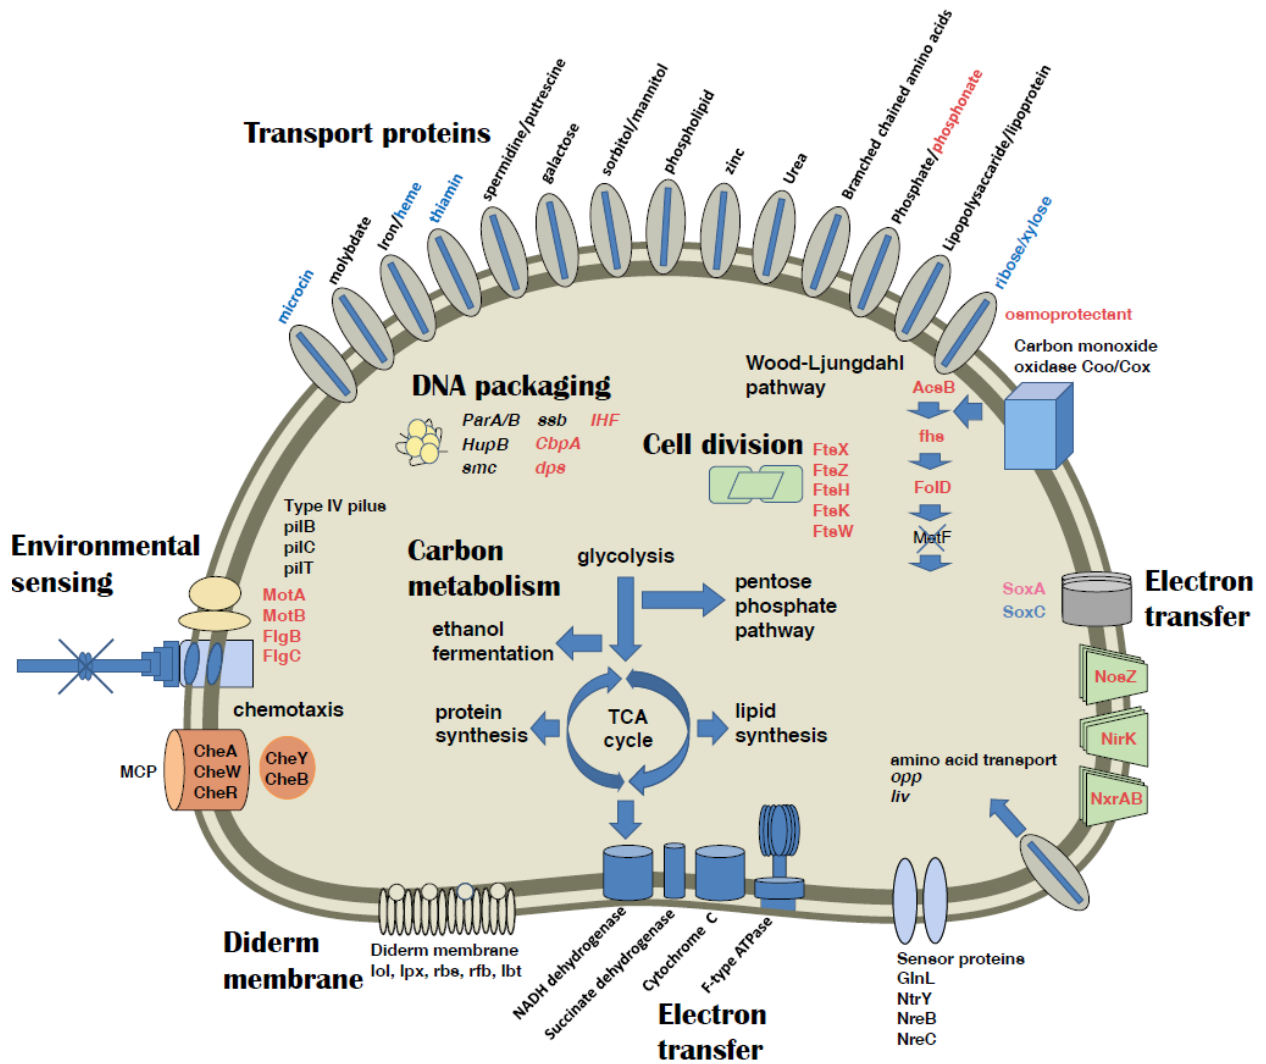

85  
86  
87  
88  
89  
90  
91  
92  
93  
94  
95  
96  
97  
98  
99  
100  
101  
102

**Supplemental Figure 1.** Composite schematic diagram of predicted metabolic features in all Rokubacteria SAGs and metagenomics bins sequenced in this study. Black text indicates pathway/proteins found in both Rokubacteria classes. Blue text indicates pathways/proteins detected only in Infratellusbacteria. Red text indicates pathways/proteins found only in Rokumicrobia. Pink text indicates genes found in a single SAG from the Finsch mine (AD-967-E21). X represents a missing protein or pathway. Also see Supplementary Table 5.

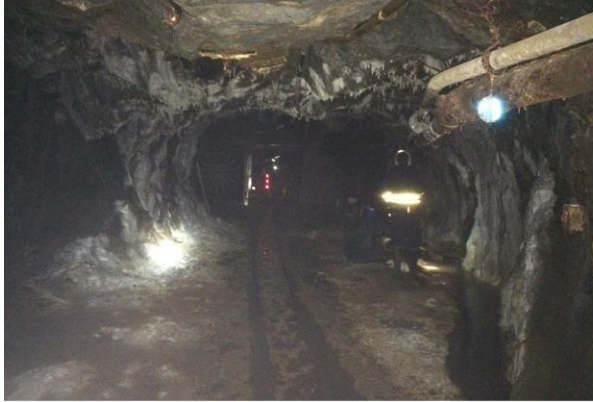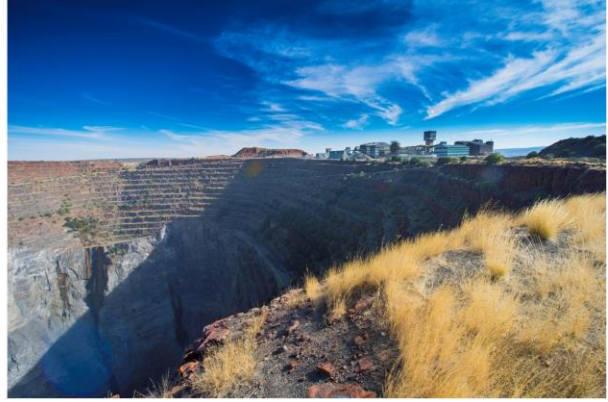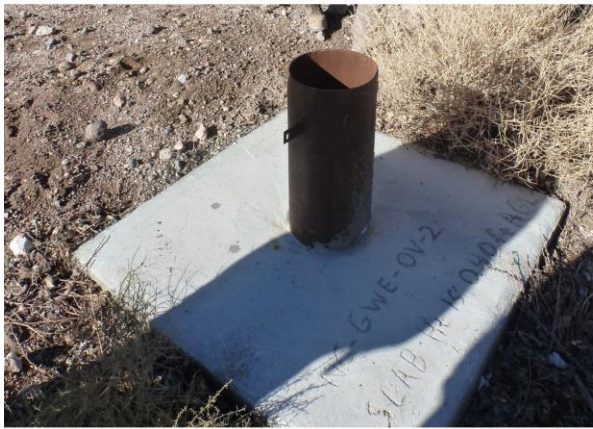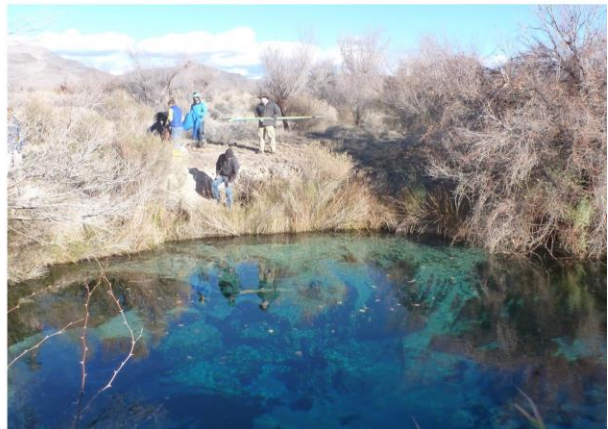

103  
104  
105  
106  
107  
108  
109  
110

**Supplemental Figure 2.** Sample sites for SAG collection. Sanford Underground Research Facility (SURF; top left); Finsch gold mine in South Africa (top right); Nevada Nye County Groundwater Evaluation well Oasis Valley 2 (bottom left); Crystal Spring in Ash Meadows Nevada (bottom right).

70 Nitro AY192281.1.1440 Bacteria Nitrospirae Nitrospira Nitrospirales 0319-6A21 uncultured candidate division SPAM bacterium  
 -|g|218686740|gb|FJ479466.1|1-1521 Uncultured bacterium clone p61190k 16S ribosomal RNA gene partial sequence  
 51 |g|281187506|gb|FJ849437.1|1-1485 Uncultured bacterium clone SedNCA5 16S ribosomal RNA gene partial sequence  
 -|g|218686250|gb|FJ478976.1|1-1523 Uncultured bacterium clone p7d190k 16S ribosomal RNA gene partial sequence  
 |g|339720978|gb|JN023622.1|2-1515 Uncultured bacterium clone mus-b143 16S ribosomal RNA gene partial sequence  
 |g|339720784|gb|JN023428.1|2-1518 Uncultured bacterium clone mus-b1 16S ribosomal RNA gene partial sequence  
 -|g|37515651|gb|JQ311860.1|1-1473 Uncultured bacterium clone OTU80-50 16S ribosomal RNA gene partial sequence  
 |g|202073204|gb|FJ152791.1|2-1517 Uncultured bacterium clone TX5A 83 16S ribosomal RNA gene partial sequence  
 6 |g|218686035|gb|FJ478761.1|1-1518 Uncultured bacterium clone p7m110k 16S ribosomal RNA gene partial sequence  
 |g|401467014|gb|JX133513.1|2-1522 Uncultured bacterium clone LG40 16S ribosomal RNA gene partial sequence  
 |g|399144773|gb|JQ769627.1|1-1525 Uncultured bacterium clone YB-1 16S ribosomal RNA gene partial sequence  
 65 |g|30647645|gb|HQ166678.1|2-1526 Uncultured bacterium clone WIF7 16S ribosomal RNA gene partial sequence  
 26 Nitro AY921949.1.1420 Bacteria Nitrospirae Nitrospira Nitrospirales 0319-6A21 uncultured candidate division SPAM bacterium  
 |g|40146663|gb|JX133621.1|2-1521 Uncultured bacterium clone S8 16S ribosomal RNA gene partial sequence  
 |g|194597920|gb|EU881154.1|3-1531 Uncultured bacterium clone KPF200711-211 16S ribosomal RNA gene partial sequence  
 27 |g|62060178|gb|KJ191944.1|2-1526 Uncultured bacterium clone MLE5 16S ribosomal RNA gene partial sequence  
 |g|330717664|gb|FJ383371.1|1-1526 Uncultured bacterium clone E1 16S ribosomal RNA gene partial sequence  
 2 |g|578003265|gb|KJF836294.1|2-1521 Uncultured bacterium clone HQ Well 02D 16S ribosomal RNA gene partial sequence  
 |g|63060117|gb|KJ191943.1|2-1524 Uncultured bacterium clone ME84 16S ribosomal RNA gene partial sequence  
 87 |g|163961489|gb|EU335207.1|2-1527 Uncultured bacterium clone BacC-s 079 16S ribosomal RNA gene partial sequence  
 -|g|218685947|gb|FJ478673.1|1-1521 Uncultured bacterium clone p27e210k 16S ribosomal RNA gene partial sequence  
 - Nitro AY192282.1.1437 Bacteria Nitrospirae Nitrospira Nitrospirales 0319-6A21 uncultured candidate division SPAM bacterium  
 |g|300385213|gb|HM187272.1|1-1485 Uncultured bacterium clone HDB SIPP543 16S ribosomal RNA gene partial sequence  
 9 |g|300385033|gb|HM187092.1|1-1485 Uncultured bacterium clone HDB SIPO442 16S ribosomal RNA gene partial sequence  
 |g|227438000|gb|FJ936945.1|2-1519 Uncultured bacterium clone kab228 16S ribosomal RNA gene partial sequence  
 49 |g|227437977|gb|FJ936922.1|2-1519 Uncultured bacterium clone kab205 16S ribosomal RNA gene partial sequence  
 |g|678942992|gb|KM200729.1|1-1523 Uncultured bacterium clone BP24 16S ribosomal RNA gene partial sequence  
 |g|389549030|gb|XU025741.1|1-1515 Uncultured bacterium clone A2 1 16S ribosomal RNA gene partial sequence  
 69 |g|163961484|gb|EU335202.1|2-1525 Uncultured bacterium clone BacC-s 039 16S ribosomal RNA gene partial sequence  
 0 |g|218686722|gb|FJ479448.1|1-1521 Uncultured bacterium clone p36j150k 16S ribosomal RNA gene partial sequence  
 |g|163961442|gb|EU335160.1|2-1525 Uncultured bacterium clone BacC-s 051 16S ribosomal RNA gene partial sequence  
 69 |g|289470024|gb|GU444092.1|2-1526 Uncultured bacterium clone 4-33 16S ribosomal RNA gene partial sequence  
 |g|289469997|gb|GU444065.1|2-1526 Uncultured bacterium clone 0-101 16S ribosomal RNA gene partial sequence  
 |g|340760931|gb|KJ638988.1|1-1523 Uncultured bacterium clone TP-DE-B100 16S ribosomal RNA gene partial sequence  
 |g|321161015|gb|HQ864119.1|5-1522 Uncultured bacterium clone TP-SL-B-100 16S ribosomal RNA gene partial sequence  
 |g|397599515|gb|JQ978587.1|2-1527 Uncultured bacterium clone SL-AM1-16 16S ribosomal RNA gene partial sequence  
 99 |g|218685920|gb|FJ478646.1|1-1518 Uncultured bacterium clone p7g200k 16S ribosomal RNA gene partial sequence  
 |g|218685817|gb|FJ478543.1|1-1518 Uncultured bacterium clone p7a150k 16S ribosomal RNA gene partial sequence  
 58 |g|55903427|gb|KJF71279.1|2-1528 Uncultured bacterium clone Y50 16S ribosomal RNA gene partial sequence  
 10 |g|441373589|gb|H5374262.1|2-1527 Uncultured bacterium clone HDB SIPP422 16S ribosomal RNA gene partial sequence  
 |g|694179000|gb|KM205483.1|1-1486 Uncultured soil bacterium clone 84-d 16S ribosomal RNA gene partial sequence  
 |g|218686781|gb|FJ479507.1|1-1521 Uncultured bacterium clone p6i030k 16S ribosomal RNA gene partial sequence  
 |g|55903382|gb|KJF712684.1|2-1530 Uncultured bacterium clone FH85 16S ribosomal RNA gene partial sequence  
 |g|55903353|gb|KJF712657.1|2-1528 Uncultured bacterium clone FH51 16S ribosomal RNA gene partial sequence  
 61 |g|321161011|gb|EU335161.1|2-1524 Uncultured bacterium clone TP-SL-B-103 16S ribosomal RNA gene partial sequence  
 |g|340760932|gb|HQ863989.1|8-1525 Uncultured bacterium clone TP-DE-B103 16S ribosomal RNA gene partial sequence  
 SPAM AG 138 D06  
 |g|163961696|gb|EU335144.1|2-1527 Uncultured bacterium clone BacC-u 045 16S ribosomal RNA gene partial sequence  
 |g|163961431|gb|EU335149.1|2-1527 Uncultured bacterium clone BacC-s 042 16S ribosomal RNA gene partial sequence  
 |g|984179400|gb|DQ499301.1|2-1521 Uncultured bacterium clone CV52 16S ribosomal RNA gene partial sequence  
 |g|194598121|gb|EU81355.1|3-1529 Uncultured bacterium clone KMS2001-1-016 16S ribosomal RNA gene partial sequence  
 42 |g|218685942|gb|FJ478668.1|1-1522 Uncultured bacterium clone p25d140k 16S ribosomal RNA gene partial sequence  
 |g|385300313|gb|JQ278911.1|2-1519 Uncultured bacterium clone hmx-264 16S ribosomal RNA gene partial sequence  
 64 |g|163961463|gb|EU335181.1|2-1524 Uncultured bacterium clone BacC-s 053 16S ribosomal RNA gene partial sequence  
 15 Nitro 3202061 k Bacteria p Nitrospirae c Nitrospira o Nitrospirales f 319-6A21 g s  
 |g|194597989|gb|EU881152.1|3-1528 Uncultured bacterium clone KPF200711-001 16S ribosomal RNA gene partial sequence  
 21 Nitro DQ387231.1.1458 Bacteria Nitrospirae Nitrospira Nitrospirales 0319-6A21 uncultured candidate division SPAM bacterium  
 |g|158519997|gb|DQ906886.2|1-1459 Uncultured bacterium clone 11B-16 16S ribosomal RNA gene partial sequence  
 2 |g|55903393|gb|KJF712695.1|2-1525 Uncultured bacterium clone LYS 16S ribosomal RNA gene partial sequence  
 -|g|330717693|gb|FJ38372.1|1-1525 Uncultured bacterium clone 187 16S ribosomal RNA gene partial sequence  
 80 -|g|194597905|gb|EU881139.1|3-1528 Uncultured bacterium clone KPF200711-033 16S ribosomal RNA gene partial sequence  
 |g|163961498|gb|EU335216.1|2-1526 Uncultured bacterium clone BacC-s 064 16S ribosomal RNA gene partial sequence  
 36 |g|194597922|gb|EU881156.1|2-1526 Uncultured bacterium clone KPF200711-139 16S ribosomal RNA gene partial sequence  
 8 |g|239737096|gb|FJ444671.1|2-1520 Uncultured bacterium clone 2y-20 16S ribosomal RNA gene partial sequence  
 85 |g|444474790|gb|KJF331271.1|2-1523 Uncultured bacterium clone ip053 16S ribosomal RNA gene partial sequence  
 |g|30060116|gb|KJ181942.1|2-1525 Uncultured bacterium clone C42 16S ribosomal RNA gene partial sequence  
 21 |g|339646780|gb|JN037993.1|2-1525 Uncultured bacterium clone UHA55.47 16S ribosomal RNA gene partial sequence  
 |g|126143473|gb|AB294346.1|1-1484 Uncultured bacterium clone p16S rRNA partial sequence clone: SWB35  
 |g|218685886|gb|FJ478612.1|1-1517 Uncultured bacterium clone p11k040k 16S ribosomal RNA gene partial sequence  
 |g|163961584|gb|EU335302.1|5-1527 Uncultured bacterium clone BacB 073 16S ribosomal RNA gene partial sequence  
 46 |g|302329827|gb|HM186438.1|2-1527 Uncultured bacterium clone GP276770A 16S ribosomal RNA gene partial sequence  
 |g|194597924|gb|EU881158.1|3-1527 Uncultured bacterium clone KPF200711-218 16S ribosomal RNA gene partial sequence  
 |g|163961449|gb|EU335167.1|2-1526 Uncultured bacterium clone BacC-s 020 16S ribosomal RNA gene partial sequence  
 |g|145203095|gb|EF494346.1|2-1523 Uncultured bacterium clone NR.1.080 16S ribosomal RNA gene partial sequence  
 57 |g|163961629|gb|EU335347.1|4-1527 Uncultured bacterium clone BacB 077 16S ribosomal RNA gene partial sequence  
 |g|330717748|gb|FJ639921.1|1-1459 Uncultured Pseudomonas sp. clone E346 16S ribosomal RNA gene partial sequence  
 7 |g|313510602|gb|KJ181942.1|2-1525 Uncultured bacterium clone Luq GN460 020 16S ribosomal RNA gene partial sequence  
 26 |g|313510603|gb|HQ454647.1|1-1450 Uncultured bacterium clone Luq GN460 021 16S ribosomal RNA gene partial sequence  
 -|g|32999202|gb|JQ978903.1|2-1520 Uncultured bacterium clone B-56 16S ribosomal RNA gene partial sequence  
 SPAM-rhizo-fig|6666666.209310.ma.26 Small Subunit Ribosomal RNA ssuRNA SSU rRNA  
 |g|330717760|gb|FJ639933.1|1-1526 Uncultured bacterium clone E42 16S ribosomal RNA gene partial sequence  
 |g|117580737|gb|DQ906816.1|1-1487 Uncultured bacterium clone 5B-17 16S ribosomal RNA gene partial sequence  
 |g|117580732|gb|DQ906811.1|1-1488 Uncultured bacterium clone 5B-8 16S ribosomal RNA gene partial sequence  
 3 SPAM AG 278 C09  
 SPAM AG 657 A01  
 |g|313510604|gb|HQ454648.1|2-1526 Uncultured bacterium clone Luq GN460 022 16S ribosomal RNA gene partial sequence  
 48 |g|300385166|gb|HM187225.1|2-1504 Uncultured bacterium clone HDB SIPP422 16S ribosomal RNA gene partial sequence  
 76 |g|300385033|gb|HM187152.1|1-1485 Uncultured bacterium clone HDB SIPO582 16S ribosomal RNA gene partial sequence  
 SPAM AG 657 L06  
 |g|300385313|gb|HM187372.1|1-1397 Uncultured bacterium clone HDB SISU406 16S ribosomal RNA gene partial sequence  
 38 |g|578003288|gb|KJF836317.1|2-1521 Uncultured bacterium clone HQ Well 09H 16S ribosomal RNA gene partial sequence  
 99 |g|313510730|gb|HQ445774.1|2-1527 Uncultured bacterium clone Luq GS470 030 16S ribosomal RNA gene partial sequence  
 65 |g|313510714|gb|HQ445758.1|1-1497 Uncultured bacterium clone Luq GS470 014 16S ribosomal RNA gene partial sequence  
 32 |g|313510717|gb|HQ445761.1|2-1527 Uncultured bacterium clone Luq GS470 017 16S ribosomal RNA gene partial sequence  
 26 |g|300385317|gb|HM187376.1|1-1395 Uncultured bacterium clone HDB SISU412 16S ribosomal RNA gene partial sequence  
 -|g|300385153|gb|HM187212.1|1-1494 Uncultured bacterium clone HDB SIPP399 16S ribosomal RNA gene partial sequence  
 60 |g|300385013|gb|HM187072.1|1-1491 Uncultured bacterium clone HDB SIPO410 16S ribosomal RNA gene partial sequence  
 31 |g|117580703|gb|DQ906782.1|1-1489 Uncultured bacterium clone 2B-1 16S ribosomal RNA gene partial sequence  
 73 |g|117580712|gb|DQ906791.1|1-1489 Uncultured bacterium clone 2B-16 16S ribosomal RNA gene partial sequence

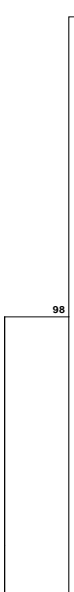

111  
112

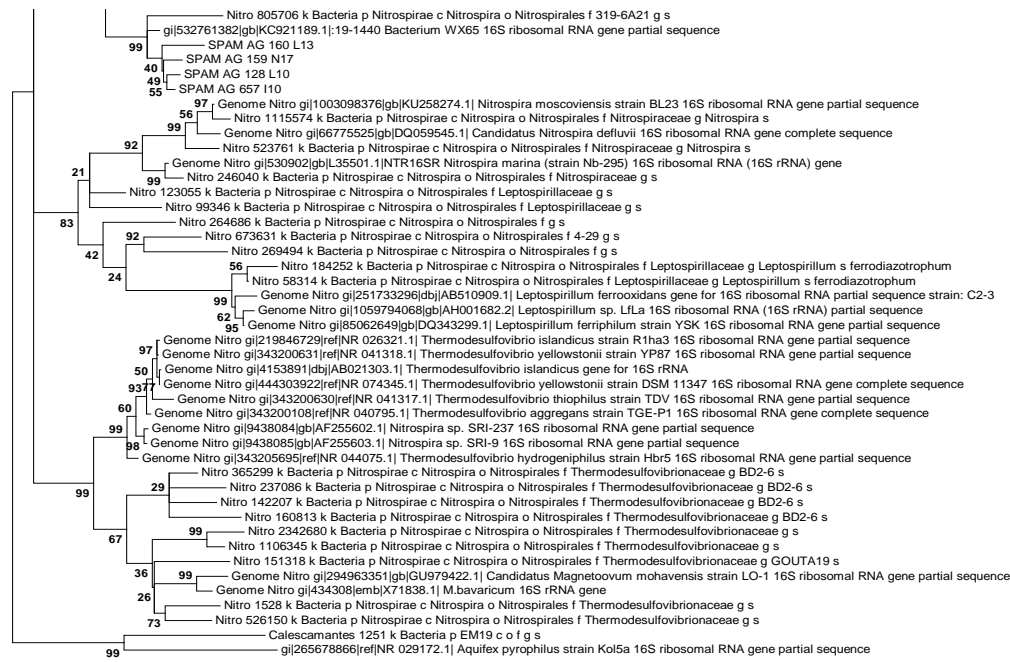

113  
 114 **Supplemental Figure 3.** 16S rRNA gene phylogeny of sequences in GenBank that were  $\geq 85\%$   
 115 identity to Rokubacteria SAG 16S rRNA gene sequences and representative Nitrospirae  
 116 sequences from all classified genera, including sequence identifiers (also see Figure 1).

117  
 118  
 119  
 120



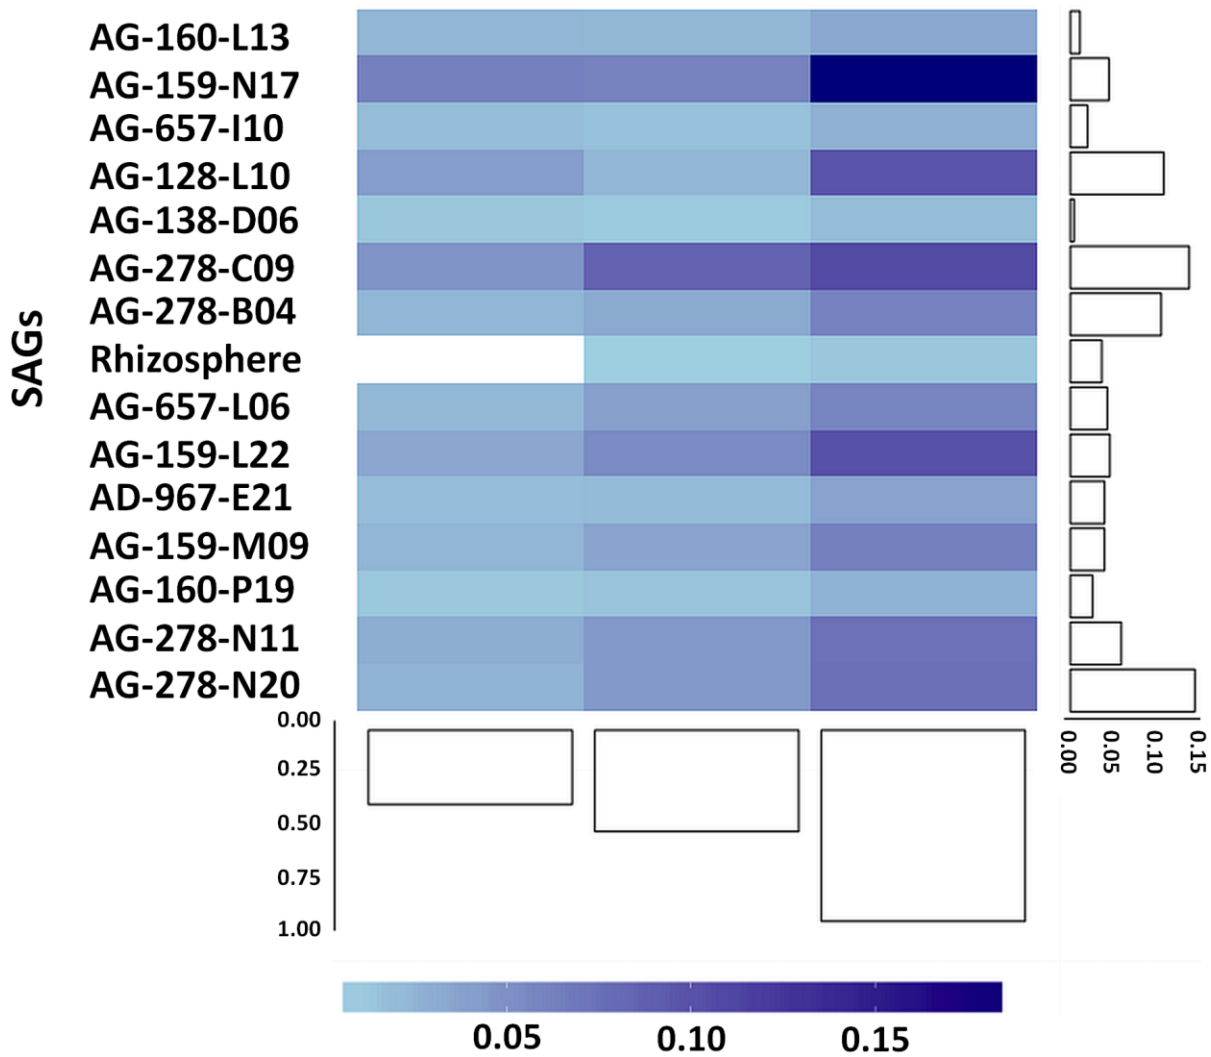

121

122 **Supplemental Figure 4.** Read mapping of OV-2 metagenomic reads to Rokubacteria SAGs  
 123 sequenced from OV-2 and the *Tabebuia* rhizosphere metagenomic assembly. Samples from left  
 124 to right are P1, P2, and P3 (see methods). Darker colors represent a higher fraction of reads  
 125 mapped to individual SAGs (scale bar on bottom). Bars on right axis indicate the fraction of  
 126 reads mapped to each individual SAG in all samples; bars on the bottom axis represent percent  
 127 read abundance in the total sample.

128  
 129  
 130  
 131  
 132  
 133  
 134  
 135  
 136

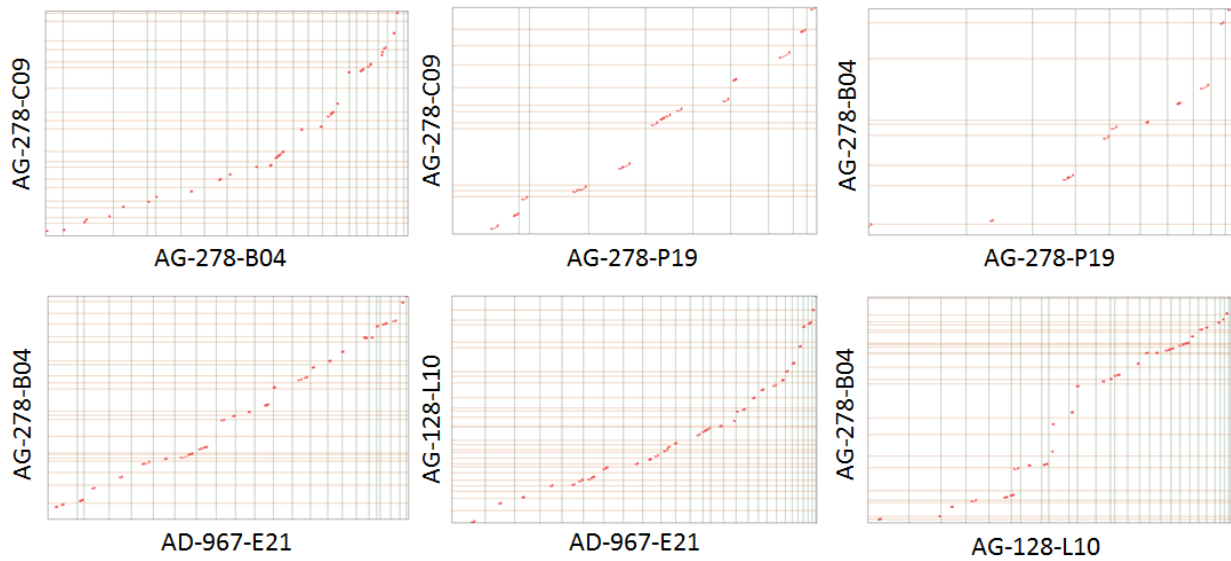

137  
 138 **Supplemental Figure 5.** Synteny plots for artificially aligned contigs (nucleotide) for 6 of the  
 139 most complete Rokubacteria single simplified genomes (SAGs) analyzed at the Joint Genome  
 140 Center’s Integrated Microbial Genomes website. Red dots indicate genes with shared locations  
 141 between artificially aligned contigs, represented by vertical lines.

142  
 143  
 144  
 145  
 146  
 147  
 148  
 149  
 150  
 151  
 152  
 153  
 154  
 155  
 156  
 157  
 158  
 159  
 160  
 161  
 162  
 163  
 164  
 165  
 166  
 167

## nxrA phylogeny

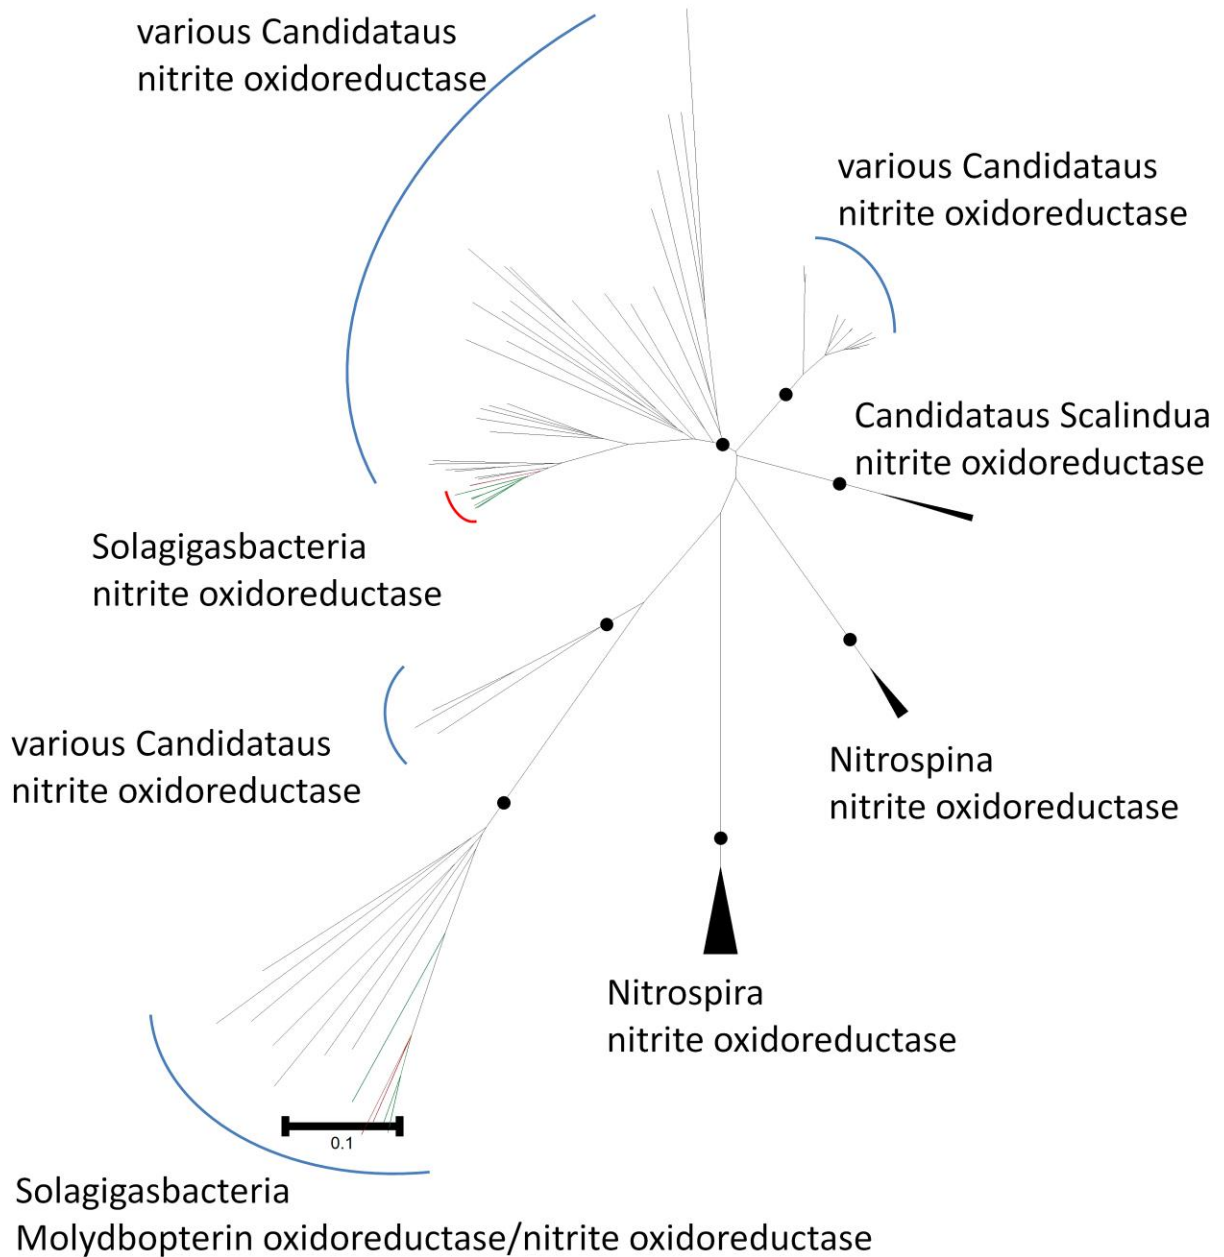

168  
169

170 **Supplemental Figure 6.** Neighbor-joining phylogeny (100X boot-strapped) of the top 100 non-  
171 environmental NxrA sequences in Genbank identified by BLASTp alignment to annotated NxrA  
172 Rokubacteria proteins. Black circles indicate boot strap values > 90%. Red lines indicate  
173 Rokumicrobia SAG sequences, and green lines represent previously annotated Rokumicrobia  
174 metagenomic bin sequences (Anantharaman et al., 2016). Tree was rooted with known  
175 Nitrospirae NxrA sequences.

176 **Supplemental Table 1.** Geochemical data and locations of sites that samples for single cell  
 177 genomics were collected for sorting and sequencing.

|                         | <b>Crystal Spring</b> | <b>OV-2 P3</b> | <b>Finsch</b> | <b>SURF</b> |
|-------------------------|-----------------------|----------------|---------------|-------------|
| Latitude                | 36.4202 N             | 36.960 N       | -28.378 S     | 44.35 N     |
| Longitude               | -116.3233 W           | -116.720 W     | 23.446 E      | -103.756 W  |
| Water Temp (°C)         | 28.49                 | 25.59          | 28.6          | 9.4         |
| Water pH                | 7.26                  | 7.44           | 6.8           | 7.71        |
| Conductivity (µS/cm)    | 782                   | 1363           | 470           | 627         |
| Dissolved oxygen (mg/L) | 3.7                   | 2.54           | 0.025         | 8           |
| Sulfate (mg/L)          | 89                    | 181            | 93            | N/A         |
| Depth (meters)          | 0                     | 9.1 – 27.4 m   | 857           | 300         |

178  
 179  
 180  
 181  
 182  
 183  
 184  
 185  
 186  
 187  
 188  
 189  
 190  
 191  
 192  
 193  
 194  
 195  
 196  
 197  
 198  
 199  
 200  
 201  
 202  
 203  
 204  
 205  
 206  
 207  
 208  
 209

210 **Supplemental Table 2.** Pairwise 16S rRNA gene nucleotide identity for all Rokubacteria single  
 211 simplified genomes (SAGs).

|            | AG-278-N11 | AG-159-M09 | AG-159-L22 | AG-159-B15 | AG-278-A09 | AG-278-N20 | AD-967-E21 | AG-657-L06 | AG-160-P19 | AG-657-A01 | AG-138-D06 | AG-278-C09 | AG-278-B04 | AG-159-N17 | AG-128-L10 | AG-657-I10 | AG-160-L13 |
|------------|------------|------------|------------|------------|------------|------------|------------|------------|------------|------------|------------|------------|------------|------------|------------|------------|------------|
| AG-278-N11 | 100        | 97.56      | 96.17      | 95.01      | 96.75      | 97.1       | 94.41      | 94.05      | 93.87      | 93.72      | 92.94      | 91.45      | 91.25      | 87.43      | 86.41      | 85.9       | 85.2       |
| AG-159-M09 | 97.56      | 100        | 96.59      | 96.25      | 97.73      | 96.36      | 93.48      | 94.29      | 94.04      | 94.42      | 93.34      | 92.4       | 90.93      | 87.78      | 86.68      | 86.29      | 86.18      |
| AG-159-L22 | 96.17      | 96.59      | 100        | 95.58      | 97.09      | 96.08      | 93.76      | 93.93      | 93.81      | 93.66      | 92.67      | 91.75      | 89.82      | 87.84      | 86.74      | 86.29      | 85.57      |
| AG-159-B15 | 95.58      | 96.25      | 95.01      | 100        | 96.04      | 95.24      | 92.64      | 93.03      | 92.19      | 94.04      | 91.44      | 91.95      | 90.71      | 86.65      | 86.88      | 85.42      | 87.67      |
| AG-278-A09 | 96.75      | 97.73      | 97.09      | 96.04      | 100        | 96.8       | 92.53      | 94.41      | 92.89      | 94.12      | 93.34      | 92.41      | 90.81      | 88.25      | 86.39      | 86.27      | 85.91      |
| AG-278-N20 | 97.1       | 96.36      | 96.08      | 95.24      | 96.8       | 100        | 94.16      | 93.2       | 93.35      | 94.14      | 92.78      | 92.17      | 91.21      | 87.71      | 86.84      | 86.27      | 85.91      |
| AD-967-E21 | 94.41      | 93.48      | 93.76      | 91.44      | 92.53      | 94.16      | 100        | 92.58      | 92.24      | 93.3       | 91.28      | 90.96      | 89.93      | 85.66      | 85         | 84.9       | 83.92      |
| AG-657-L06 | 94.05      | 94.29      | 93.93      | 94.04      | 94.41      | 93.2       | 92.58      | 100        | 92.25      | 92.52      | 92.95      | 92.59      | 91.25      | 87.2       | 86.46      | 86.21      | 86.39      |
| AG-160-P19 | 93.87      | 94.04      | 93.81      | 92.19      | 92.89      | 93.35      | 92.24      | 92.25      | 100        | 92.56      | 90.95      | 91.1       | 89.88      | 86.61      | 86.61      | 85.38      | 86.98      |
| AG-657-A01 | 93.72      | 94.42      | 93.66      | 93.03      | 94.12      | 94.14      | 93.3       | 92.52      | 92.56      | 100        | 95.26      | 96.8       | 96.07      | 86.74      | 86.82      | 86.64      | 85.63      |
| AG-138-D06 | 92.94      | 93.34      | 92.67      | 92.64      | 93.34      | 92.78      | 91.28      | 92.95      | 90.96      | 95.26      | 100        | 94.72      | 91.99      | 86.67      | 86.44      | 85.66      | 85.31      |
| AG-278-C09 | 91.47      | 92.42      | 91.76      | 91.94      | 92.41      | 92.17      | 90.96      | 92.59      | 91.1       | 96.8       | 94.72      | 100        | 95.77      | 87.17      | 85.5       | 85.4       | 84.39      |
| AG-278-B04 | 91.26      | 90.93      | 89.84      | 90.71      | 90.81      | 91.21      | 89.93      | 91.25      | 89.88      | 96.07      | 91.99      | 95.77      | 100        | 85.54      | 85.2       | 84.64      | 82.81      |
| AG-159-N17 | 87.43      | 87.78      | 87.84      | 87.67      | 88.25      | 87.71      | 85.66      | 87.2       | 86.61      | 86.7       | 86.67      | 87.17      | 85.54      | 100        | 93.46      | 94.34      | 92.32      |
| AG-128-L10 | 86.37      | 86.68      | 86.74      | 86.88      | 86.39      | 86.84      | 84.96      | 86.46      | 86.61      | 86.82      | 86.44      | 85.5       | 85.14      | 93.46      | 100        | 96.16      | 90.78      |
| AG-657-I10 | 86.37      | 86.68      | 86.74      | 86.88      | 86.27      | 86.27      | 84.96      | 86.46      | 86.61      | 86.82      | 86.44      | 85.5       | 85.14      | 93.46      | 96.16      | 100        | 90.78      |
| AG-160-L13 | 85.2       | 86.18      | 85.57      | 85.42      | 85.91      | 85.91      | 83.92      | 86.39      | 86.98      | 85.63      | 85.29      | 84.39      | 82.81      | 92.32      | 90.78      | 90.85      | 100        |

212  
 213  
 214  
 215  
 216  
 217  
 218  
 219  
 220  
 221  
 222  
 223  
 224  
 225  
 226  
 227  
 228  
 229  
 230  
 231  
 232  
 233  
 234

235 **Supplemental Table 3.** Riffle Rokumicrobia metagenome bin assembly statistics and predicted  
 236 genome completeness from (Anantharaman et al., 2016). Genome completeness and  
 237 contamination were estimated using checkM (Parks et al., 2015).

| Rokubacteria SAGs  | Class        | Site   | Assembly (Mbps) | GC % | Genome completeness, % | Contamination, % |
|--------------------|--------------|--------|-----------------|------|------------------------|------------------|
| RIFCSPLOWO2_02_73  | Rokubacteria | Riffle | 4.05            | 73.4 | 87.6                   | 4.81             |
| RIFCSPLOWO2_12_73  | Rokubacteria | Riffle | 4.04            | 73.4 | 87.0                   | 2.67             |
| RIFCSPLOWO2_02_72  | Rokubacteria | Riffle | 2.39            | 71.8 | 64.1                   | 1.71             |
| GWA2_73_35         | Rokubacteria | Riffle | 3.54            | 72.8 | 71.2                   | 2.67             |
| RIFCSPHIGHO2_02_73 | Rokubacteria | Riffle | 4.36            | 72.9 | 84.3                   | 5.77             |
| GWC2_70_24         | Rokubacteria | Riffle | 2.94            | 70.2 | 75.7                   | 1.82             |
| GWA2_70_23         | Rokubacteria | Riffle | 4.66            | 70.0 | 84.2                   | 2.96             |
| RIFCSPHIGHO2_12_73 | Rokubacteria | Riffle | 3.62            | 72.8 | 68.3                   | 2.67             |
| RIFCSPLOWO2_12_69  | Rokubacteria | Riffle | 2.81            | 68.1 | 70.2                   | 14.22            |
| RIFCSPLOWO2_12_71  | Rokubacteria | Riffle | 3.44            | 71.4 | 68.3                   | 4.73             |
| RBG_16_73_20       | Rokubacteria | Riffle | 3.76            | 71.9 | 67.6                   | 2.04             |
| RIFCSPLOWO2_02_68  | Rokubacteria | Riffle | 3.09            | 67.1 | 79.5                   | 2.69             |
| RIFCSPLOWO2_02_71  | Rokubacteria | Riffle | 1.04            | 68.3 | 31.3                   | 0.38             |
| RIFCSPLOWO2_12_71  | Rokubacteria | Riffle | 3.48            | 70.8 | 63.7                   | 3.44             |
| GWC2_70_16         | Rokubacteria | Riffle | 4.70            | 70.9 | 77.9                   | 1.82             |
| GWF2_70_14         | Rokubacteria | Riffle | 3.32            | 69.3 | 66.5                   | 2.14             |
| RIFCSPHIGHO2_02_69 | Rokubacteria | Riffle | 2.58            | 64.2 | 54.4                   | 5.66             |

238  
 239  
 240  
 241  
 242  
 243  
 244  
 245  
 246  
 247  
 248  
 249  
 250  
 251

252 **Supplemental Table 4.** Rokubacteria mobile elements and viral signatures.

| <b>Rokubacteria SAGs</b>            | <b>Class</b>        | <b>Site</b>       | <b>Mobile element count</b> | <b>Phage genes</b> | <b>CRISPRs</b> |
|-------------------------------------|---------------------|-------------------|-----------------------------|--------------------|----------------|
| <b>*AD-967-E21</b>                  | Rokumicrobia        | Finsch            | 60 (3.8%)                   | 14                 | 5              |
| <b>*AG-128-L10</b>                  | Infratellusbacteria | CS <sup>1</sup>   | 38 (2.2%)                   | 12                 | 2              |
| AG-138-D06                          | Rokumicrobia        | SURF <sup>2</sup> | 7 (2.6%)                    | 3                  | 1              |
| AG-657-A01                          | Rokumicrobia        | OV-2              | 14 (3.8%)                   | 2                  | 0              |
| <b>*AG-657-I10</b>                  | Infratellusbacteria | OV-2              | 21 (2.2%)                   | 7                  | 2              |
| <b>*AG-657-L06</b>                  | Rokumicrobia        | OV-2              | 26 (2.5%)                   | 6                  | 0              |
| AG-159-B15                          | Rokumicrobia        | OV-2              | 3 (5.5%)                    | 0                  | 0              |
| AG-159-G23                          | Rokumicrobia        | OV-2              | 23 (5.3%)                   | 3                  | 0              |
| <b>*AG-159-L22</b>                  | Rokumicrobia        | OV-2              | 21 (3.1%)                   | 4                  | 2              |
| <b>*AG-159-M09</b>                  | Rokumicrobia        | OV-2              | 21 (2.2%)                   | 7                  | 1              |
| AG-159-N17                          | Infratellusbacteria | OV-2              | 28 (2.46%)                  | 6                  | 0              |
| AG-159-P01                          | Rokumicrobia        | OV-2              | 3 (0.4%)                    | 0                  | 0              |
| AG-160-L13                          | Infratellusbacteria | OV-2              | 10 (2.4%)                   | 1                  | 1              |
| <b>*AG-160-P19</b>                  | Rokumicrobia        | OV-2              | 51 (3.6%)                   | 9                  | 4              |
| AG-278-A09                          | Rokumicrobia        | OV-2              | 8 (2.3%)                    | 2                  | 0              |
| <b>*AG-278-B04</b>                  | Rokumicrobia        | OV-2              | 38 (1.5%)                   | 15                 | 3              |
| <b>*AG-278-C09</b>                  | Rokumicrobia        | OV-2              | 26 (1.6%)                   | 10                 | 4              |
| <b>*AG-278-N11</b>                  | Rokumicrobia        | OV-2              | 22 (2%)                     | 12                 | 1              |
| <b>*AG-278-N20</b>                  | Rokumicrobia        | OV-2              | 38 (5%)                     | 15                 | 7              |
| <b>*OV-2 bin<sup>8</sup></b>        | Infratellusbacteria | OV-2              | 64 (4.1%)                   | 32                 | 1              |
| <b>*Rhizosphere bin<sup>3</sup></b> | Rokumicrobia        | Puerto Rico       | 15 (0.5%)                   | 23                 | 0              |

253  
254  
255  
256  
257  
258  
259  
260  
261  
262  
263  
264  
265  
266  
267  
268  
269  
270  
271  
272

273 **Supplemental Table 5.** Summary of KO numbers for annotated genes of major energy and  
 274 metabolic pathways for the Rokubacteria classes Rokumicrobia and Infratellusbacteria (also  
 275 Supplemental Figure 1). X represents absent protein.

| <b>Gene annotation</b>                                      | <b>Rokumicrobia</b> | <b>Infratellusbacteria</b> |
|-------------------------------------------------------------|---------------------|----------------------------|
| <b><u>Glycolysis</u></b>                                    |                     |                            |
| hexokinase                                                  | X                   | X                          |
| glucose-6-phosphate isomerase                               | K01810              | K01810                     |
| 6-phosphofructokinase                                       | K00850              | K00850                     |
| fructose-bisphosphate aldolase                              | K01623              | K01623                     |
| glyceraldehyde 3-phosphate dehydrogenase                    | K00134              | K00134                     |
| phosphoglycerate kinase                                     | K00927              | K00927                     |
| 2,3-bisphosphoglycerate-independent phosphoglycerate mutase | K15633              | K15633                     |
| glyceraldehyde-3-phosphate dehydrogenase                    | K00131              | K00131                     |
| enolase                                                     | K01689              | K01689                     |
| pyruvate kinase                                             | K00873              | K00873                     |
| <b><u>TCA cycle</u></b>                                     |                     |                            |
| phosphoenolpyruvate carboxylase                             | K01586              | K01586                     |
| citrate synthase                                            | K01647              | K01647                     |
| aconitate hydratase 1                                       | K01681              | K01681                     |
| isocitrate dehydrogenase                                    | K00031              | K00031                     |
| 2-oxoglutarate ferredoxin oxidoreductase                    | K00174              | K00174                     |
| succinyl-CoA synthetase                                     | K01902              | K01902                     |
| succinate dehydrogenase                                     | K00234              | K00234                     |
| fumarate hydratase A                                        | K01676              | K01676                     |
| malate dehydrogenase                                        | K00025              | K00025                     |
| <b><u>Reverse TCA</u></b>                                   |                     |                            |
| pyruvate:ferredoxin oxidoreductase                          | K00169              | K00169                     |
| acetyl-CoA reductase                                        | K01895              | K01895                     |
| ATP citrate lyase                                           | X                   | X                          |
| <b><u>Wood Ljungdahl pathway</u></b>                        |                     |                            |
| carbon monoxide dehydrogenase                               | K00198              | K00198                     |
| acetyl-CoA synthase                                         | X                   | X                          |
| <b><u>DNA packaging proteins</u></b>                        |                     |                            |
| DNA gyrase <i>gyrA/B</i>                                    | K02469/70           | K02469/70                  |
| Topoisomerase <i>topA</i>                                   | K03168              | K03168                     |
| Single-stranded DNA binding protein <i>ssb</i>              | K03111              | K03111                     |
| family partition protein 2 <i>parA + parB</i>               | K03496/7            | K03496/7                   |
| DNA binding protein <i>hupB</i>                             | K03530              | K03530                     |
| chromosome segregation protein <i>smc</i>                   | K03529              | K03529                     |
| Curved DNA-binding protein <i>cbpA</i>                      | K05516              | X                          |
| Integration host factor IHF                                 | K04764              | X                          |
| Starvation-inducible DNA-binding protein <i>dps</i>         | K04047              | X                          |
| Fis (DNA binding protein)                                   | K03557              | X                          |
| <b><u>Diderm membrane metabolism</u></b>                    |                     |                            |
| flagellar L-ring protein precursor FlgH                     | K02393              | X                          |



|                                                             |                     |                     |
|-------------------------------------------------------------|---------------------|---------------------|
| flagellar P-ring protein precursor FlgI                     | K02394              | X                   |
| Preprotein translocase SecY                                 | K03076              | K03076              |
| Sec-independent translocation TatC protein                  | K03118              | K03118              |
| Prolipoprotein diacylglyceryl transferase LGT               | K13292              | K13292              |
| Lipoprotein signal peptidase Peptidase_A8                   | X                   | X                   |
| Bac_surface_Ag                                              | K18827              |                     |
| Bacterial general secretion pathway protein D Secretin      | X                   | X                   |
| Secretin_N                                                  | X                   | X                   |
| UDP-3-O-acyl-N-acetylglucosamine deacetylase LpxCD/         | K02535/6            | K02535/6            |
| Organic solvent tolerance-like, N-terminal OstA Surf_Ag_VNR | X                   | X                   |
| outer membrane lipoprotein carrier protein LolA             | K03634              | K03634              |
| outer membrane lipoprotein carrier protein LolC             | K09808              | K09808              |
| <b><u>Sulfur metabolism</u></b>                             |                     |                     |
| SOX pathway                                                 | K17222 <sup>1</sup> | X                   |
| sulfane dehydrogenase subunit SoxC                          | X                   | K17225 <sup>2</sup> |
| <b><u>Nitrogen metabolism</u></b>                           |                     |                     |
| ferredoxin-nitrate reductase NarB                           | K00367              | X                   |
| nitrite reductase (NO-forming) NirK                         | K00368              | X                   |
| nitrous-oxide reductase NosZ                                | K00376 <sup>1</sup> | X                   |
| nitrate reductase / nitrite oxidoreductase NxrA/B           | K00370              | X                   |
| <b><u>Flagella and pili assembly</u></b>                    |                     |                     |
| Type IV pilus assembly protein pilC                         | K02653              | K02653              |
| twitching motility protein pilT                             | K02669              | K02669              |
| Type IV pilus assembly protein pilB                         | K02652              | K02652              |
| chemotaxis protein motA/B                                   | K02556/7            | X                   |
| flagellar P-ring protein precursor FlgI                     | K02394              | X                   |
| flagellar L-ring protein precursor FlgH                     | K02393              | X                   |
| flagellar basal-body rod protein FlgG                       | K02392              | X                   |
| flagellin FliC                                              |                     |                     |
| flagellar hook-associated protein 2 FliD                    | K02407              | X                   |

276 <sup>1</sup> Only annotated in one Rokumicrobia SAG from Finsch gold mine, South Africa (AD-967-E21).

277 <sup>2</sup> Only annotated in one Infratellusbacteria SAG from Crystal Spring, Nevada (AG-128-L10).

278

279

280

281

282

283

284

285 **Supplemental Table 6.** Top BLAST hits of genes from OV-2 Infratellusbacteria metagenome  
 286 bin (bin 8) to Rokumicrobia single-amplified genomes (SAGs). Also see main text Figure 2.

| <b>Gene RAST ID</b>          |                            |                 |               |              |            |
|------------------------------|----------------------------|-----------------|---------------|--------------|------------|
| <b>OV-2 bin</b>              |                            | <b>%</b>        |               | <b>e-</b>    |            |
| <b>(Infratellusbacteria)</b> | <b>SAGs (Rokumicrobia)</b> | <b>identity</b> | <b>length</b> | <b>value</b> | <b>SAG</b> |
| 215894.peg.5579              | 150852.peg.275             | 100             | 382           | 0            | AG-278-B04 |
| 215894.peg.5309              | 150853.peg.21              | 99.88           | 801           | 0            | AG-278-C09 |
| 215894.peg.2670              | 140332.peg.919             | 94.89           | 333           | 0            | AD-967-E21 |
| 215894.peg.664               | 132753.peg.570             | 93.15           | 788           | 0            | AG-159-M09 |
| 215894.peg.2669              | 150857.peg.933             | 91.24           | 411           | 0            | AG-278-N11 |
| 215894.peg.4356              | 132754.peg.281             | 86.51           | 415           | 0            | AG-159-N17 |
| 215894.peg.1331              | 132749.peg.48              | 75.78           | 574           | 0            | AG-159-B15 |
| 215894.peg.1090              | 140334.peg.57              | 74.88           | 633           | 0            | AG-138-D06 |

287  
 288  
 289

290 **Supplemental Table 7.** JGI IMG accession numbers for all Rokubacteria single amplified  
 291 genomes and metagenomes.

| <b>SAG name</b>     | <b>IMG ID</b> |
|---------------------|---------------|
| AG-159-B15          | 2651869898    |
| AG-160-L13          | 2651869893    |
| AG-159-M09          | 2651869895    |
| AG-159-L22          | 2651869896    |
| AG-278-N11          | 2651869891    |
| AG-159-P01          | 2713897487    |
| AG-160-P19          | 2651869612    |
| AG-278-B04          | 2651869612    |
| AG-138-D06          | 2651869899    |
| AG-159-G23          | 2651869897    |
| AG-128-L10          | 2651869900    |
| AD-967-E21          | 2651869901    |
| AG-278-C09          | 2651869892    |
| AG-159-N17          | 2651869894    |
| AG-657-I10          | 2747842444    |
| AG-657-L06          | 2747842445    |
| AG-657-A01          | 2747842443    |
| AG-278-A09          | 2747842441    |
| AG-278-N20          | 2747842442    |
| <b>Metagenome</b>   |               |
| Oasis Valley 2 (P3) | 330009444     |
| Oasis Valley 2 (P2) | 330009691     |
| Oasis Valley 2 (P1) | 330009626     |
| Tabelua rhizophere  | 330005985     |

292

293 **References**

294

295 Anantharaman, K., Brown, C.T., Hug, L.A., Sharon, I., Castelle, C.J., Probst, A.J. et al.  
296 (2016) Thousands of microbial genomes shed light on interconnected biogeochemical processes  
297 in an aquifer system. *Nat Commun* **7**: 13219.

298 Butterfield, C.N., Li, Z., Andeer, P.F., Spaulding, S., Thomas, B.C., Singh, A. et al. (2016)  
299 Proteogenomic analyses indicate bacterial methylotrophy and archaeal heterotrophy are  
300 prevalent below the grass root zone. *PeerJ* **4**: e2687.

301 Dillon, S.C., and Dorman, C.J. (2010) Bacterial nucleoid-associated proteins, nucleoid  
302 structure and gene expression. *Nat Rev Microbiol* **8**: 185-195.

303 Hartman, T., Weinrick, B., Vilcheze, C., Berney, M., Tufariello, J., Cook, G.M., and Jacobs,  
304 W.R., Jr. (2014) Succinate dehydrogenase is the regulator of respiration in *Mycobacterium*  
305 *tuberculosis*. *PLoS Pathog* **10**: e1004510.

306 Hug, L.A., Thomas, B.C., Sharon, I., Brown, C.T., Sharma, R., Hettich, R.L. et al. (2016)  
307 Critical biogeochemical functions in the subsurface are associated with bacteria from new phyla  
308 and little studied lineages. *Environ Microbiol* **18**: 159-173.

309 Hugler, M., Wirsén, C.O., Fuchs, G., Taylor, C.D., and Sievert, S.M. (2005) Evidence for  
310 autotrophic CO<sub>2</sub> fixation via the reductive tricarboxylic acid cycle by members of the epsilon  
311 subdivision of proteobacteria. *J Bacteriol* **187**: 3020-3027.

312 Lee, S.Y., Lim, C.J., Droge, P., and Yan, J. (2015) Regulation of Bacterial DNA Packaging in  
313 Early Stationary Phase by Competitive DNA Binding of Dps and IHF. *Sci Rep* **5**: 18146.

314 Parks, D.H., Imelfort, M., Skennerton, C.T., Hugenholtz, P., and Tyson, G.W. (2015)  
315 CheckM: assessing the quality of microbial genomes recovered from isolates, single cells, and  
316 metagenomes. *Genome Res* **25**: 1043-1055.

317 Sorokin, D.Y., Lucker, S., Vejmekova, D., Kostrikina, N.A., Kleerebezem, R., Rijpstra, W.I.  
318 et al. (2012) Nitrification expanded: discovery, physiology and genomics of a nitrite-oxidizing  
319 bacterium from the phylum Chloroflexi. *ISME J* **6**: 2245-2256.

320

321

322
